# Supplementary material for: Survey of surgical critical care applicant and program director views on virtual interviews for fellowship training: a Surgical Critical Care Program Directors Society sponsored study
Source: HighWire-hosted journal article supplement (doi:10.1136/tsaco-2022-000898), 2022-03-01
Supplement: tsaco-2022-000898supp001_data_supplement.pdf [file tsaco-2022-000898supp001_data_supplement.pdf]

## QUESTIONNAIRE

Gender M F Prefer to not answer

Age

Year that you started your fellowship

Number of SCC programs I applied to:

How many interviews were you offered?

How many interviews did you actually attend?

### APPLICANTS:

#### For the program you matched to:

If you had an **in-person interview**, please complete the follow on a scale of 1 to 5 (with 1 being “strongly agree” and 5 being “strongly disagree”)

The cost of travel for interviews limited the number of interviews I accepted

The difficulties of scheduling time away from residency responsibilities limited the number of interviews that I accepted

An in-person interview helped me to get a much better sense of the program than I would have otherwise

Visiting the program was critical to seeing the hospital and educational environment

As a result of the in-person interview, I ranked this program more highly than I would have without a visit

If you had a **virtual interview only**, please complete the following on a scale of 1 to 5 (with 1 being “strongly agree” and 5 being “strongly disagree”)

I liked the virtual interview process

As compared to previous in-person interviews I have had (e.g. residency), I would prefer having a virtual interview in the future rather than an in-person interview

I was able to get a good feel for the program via the virtual interview process and any other research I did for each program

An in-person interview would have allowed me to gain a better understanding of the educational environment and offering of each program

An in-person interview would have allowed me to gain a better understanding of the comradery and esprit d'corps of each program

I applied to more SCC fellowship programs than I would have if all interviews were in-person

I accepted more SCC fellowship interview offers than I would have if all interviews were in-person

If you had a virtual interview only, what format(s) were used: (choose one option)

Group interview with multiple attendings at once, including the PD

Group interview with multiple attendings at once and a separate interview with the PD

Separate interviews with attendings and the PD

Other (describe briefly)

If you had a virtual interview only,

Were you offered a virtual meeting with current fellows and/or residents in the program

Did you have a virtual tour of the ICU and/or the hospital

#### **PROGRAM DIRECTORS:**

For the virtual fellowship interviews completed this year (2020), please complete the following on a scale of 1 to 5 (with 1 being "strongly agree" and 5 being "strongly disagree")

I liked the virtual interview process

Our program received more applications this year compared to last year

Our program interviewed more applicants this year compared to last year

In-person interviews offer an advantage to the candidate to present themselves and develop rapport with the interviewer

In-person interviews offer an advantage to the program to present the learning environment

We were able to provide a good representation of our fellowship program in a virtual format

We were able to adequately interact and assess the candidates in a virtual format

Technology limitations and glitches made the interview process challenging

Based on the experience this year, we will change our interview practices

In the future, we will conduct exclusively virtual interviews

In the future, we will use a hybrid model involving some virtual and some in-person interviews in the same year

For virtual interviews, what format(s) were used: (choose one option)

Group interview with multiple attendings at once, including the program director

Group interview with multiple attendings at once and a separate interview with the program directors

Separate interviews with attendings and the program director

Other (describe briefly)

If you had a virtual interview only,

Did you offer a virtual meeting with current fellows and/or residents in the program?

Did you offer a virtual tour of the ICU and/or the hospital
